# Supplementary material
Source: publisher figshare collection journal article supplement (https://aacr.figshare.com/articles/dataset/_/22402400)
Supplement: Supplementary file 1 [file 39848195]

**Supplementary Table S1.** Patient clinical information

| No. | Patient ID | Gender | Histological Pattern (Lauren Classification) | Degree of differentiation |
|-----|------------|--------|----------------------------------------------|---------------------------|
| 1   | GC11       | M      | Not otherwise stated                         | Moderate                  |
| 2   | GC12       | M      | Not otherwise stated                         | Poor                      |
| 3   | GC13       | M      | Mixed                                        | Poor                      |
| 4   | GC14       | M      | Diffuse                                      | Poor                      |
| 5   | GC15       | M      | Not otherwise stated                         | Poor                      |
| 6   | GC16       | M      | Intestinal                                   | Well and moderate         |
| 7   | GC20       | F      | Diffuse                                      | Poor                      |
| 8   | GC21       | M      | Intestinal                                   | Moderate and poor         |
| 9   | GC24       | M      | Intestinal                                   | Poor                      |
| 10  | GC25       | M      | Diffuse                                      | Poor                      |
| 11  | GC26       | F      | Intestinal                                   | Moderate                  |
| 12  | GC38       | F      | Not otherwise stated                         | Poor                      |
| 13  | GC43       | M      | Intestinal                                   | Moderate                  |
| 14  | GC44       | F      | Diffuse                                      | Poor                      |
| 15  | GC45       | F      | Intestinal                                   | Moderate                  |
| 16  | GC47       | F      | Intestinal                                   | Moderate                  |
| 17  | GC48       | F      | Mixed                                        | Poor                      |
| 18  | GC54       | F      | Intestinal                                   | Poor                      |
| 19  | GC55       | M      | Mixed                                        | Poor                      |
| 20  | GC59       | M      | Diffuse                                      | Poor                      |
| 21  | GC60       | M      | Diffuse                                      | Not otherwise stated      |
| 22  | GC62       | M      | Intestinal                                   | Moderate                  |
| 23  | GC66       | M      | Intestinal                                   | Poor                      |
| 24  | GC67       | M      | Not otherwise stated                         | Not otherwise stated      |
| 25  | GC68       | F      | Intestinal                                   | Moderate                  |
| 26  | GC69       | F      | Not otherwise stated                         | Poor                      |
| 27  | GC70       | F      | Intestinal                                   | Moderate                  |
| 28  | GC71       | F      | Diffuse                                      | Poor                      |
| 29  | GC72       | M      | Intestinal                                   | Poor                      |
| 30  | GC73       | M      | Mixed                                        | Poor                      |
| 31  | GC74       | M      | Not otherwise stated                         | Moderate                  |
| 32  | GC75       | F      | Intestinal                                   | Poor                      |
| 33  | GC76       | F      | Intestinal                                   | Poor                      |
| 34  | GC77       | F      | Not otherwise stated                         | Not otherwise stated      |
| 35  | GC78       | M      | Intestinal                                   | Moderate                  |
| 36  | GC79       | M      | Intestinal                                   | Not otherwise stated      |
| 37  | GC80       | F      | Diffuse                                      | Not otherwise stated      |
| 38  | GC82       | F      | Not otherwise stated                         | Poor                      |
| 39  | GC83       | F      | Diffuse                                      | Poor                      |
| 40  | GC84       | F      | Intestinal                                   | Poor                      |
| 41  | GC85       | M      | Intestinal                                   | Poor                      |
| 42  | GC86       | M      | Diffuse                                      | Poor                      |
| 43  | GC87       | M      | Mixed                                        | Poor                      |
| 44  | GC88       | F      | Intestinal                                   | Moderate                  |
| 45  | GC89       | F      | Intestinal                                   | Poor                      |
| 46  | GC90       | M      | Diffuse                                      | Poor                      |
| 47  | GC91       | M      | Intestinal                                   | Poor                      |
| 48  | GC92       | F      | Mixed                                        | Poor/Signet ring          |
| 49  | GC93       | M      | Intestinal                                   | moderate                  |
| 50  | GC94       | M      | Diffuse                                      | Poor                      |
| 51  | GC101      | F      | Mixed                                        | Poor                      |
| 52  | GC121      | M      | Intestinal                                   | Poor                      |
| 53  | GC123      | M      | Intestinal                                   | moderate/poor             |
| 54  | GC125      | F      | Intestinal                                   | moderate                  |
